# Supplementary material for: Enhanced electrochemical catalysis and sensing applications: fabrication process optimization and electrocatalytic characterization of polymeric matrix composite for one-step synthesis of Pd nanoparticle-decorated laser-induced graphene electrodes
Source: Royal Society of Chemistry journal article supplement (doi:10.1039/d4ta08876j), 2025-01-01
Supplement: d4ta08876j1.pdf [file d4ta08876j1.pdf]

## Supporting Information

Enhanced electrochemical catalysis and sensing applications: fabrication process optimization and electrocatalytic characterization of polymeric matrix composite for one-step synthesis of Pd nanoparticle-decorated laser-induced graphene electrodes

*Asamee Soleh<sup>a,b,c,d,e</sup>, Kasrin Saisahas<sup>d,e</sup>, Kiattisak Promsuwan<sup>a,d,e</sup>, Jenjira Saichanapan<sup>d,e</sup>, Panote Thavarungkul<sup>a,b,c</sup>, Proespichaya Kanatharana<sup>a,b,c</sup>, Lingyin Meng<sup>f</sup>, Wing Cheung Mak<sup>f,g\*\*</sup>, Warakorn Limbut<sup>a,b,d,e\*</sup>*

<sup>a</sup> Center of Excellence for Trace Analysis and Biosensor, Prince of Songkla University, Hat Yai, Songkhla, 90110, Thailand

<sup>b</sup> Center of Excellence for Innovation in Chemistry, Faculty of Science, Prince of Songkla University, Hat Yai, Songkhla, 90110, Thailand

<sup>c</sup> Division of Physical Science, Faculty of Science, Prince of Songkla University, Hat Yai, Songkhla, 90110, Thailand

<sup>d</sup> Division of Health and Applied Sciences, Faculty of Science, Prince of Songkla University, Hat Yai, Songkhla, 90110, Thailand

<sup>e</sup> Forensic Science Innovation and Service Center, Prince of Songkla University, Hat Yai, Songkhla, 90110, Thailand

<sup>f</sup> Division of Sensor and Actuator Systems, Department of Physics, Chemistry and Biology, Linköping University, Linköping, SE-581 83, Sweden

<sup>g</sup> Department of Biomedical Engineering, the Chinese University of Hong Kong, Hong Kong SAR, China

\*Corresponding author at: Division of Health and Applied Sciences, Faculty of Science, Prince of Songkla University, Hat Yai, Songkhla 90110, Thailand.

E-mail addresses: warakorn.l@psu.ac.th (W. Limbut)

\*\*Corresponding author at: Department of Biomedical Engineering, the Chinese University of Hong Kong, Hong Kong SAR, China

E-mail addresses: wing.cheung.mak@cuhk.edu.hk (W.C. Mak)

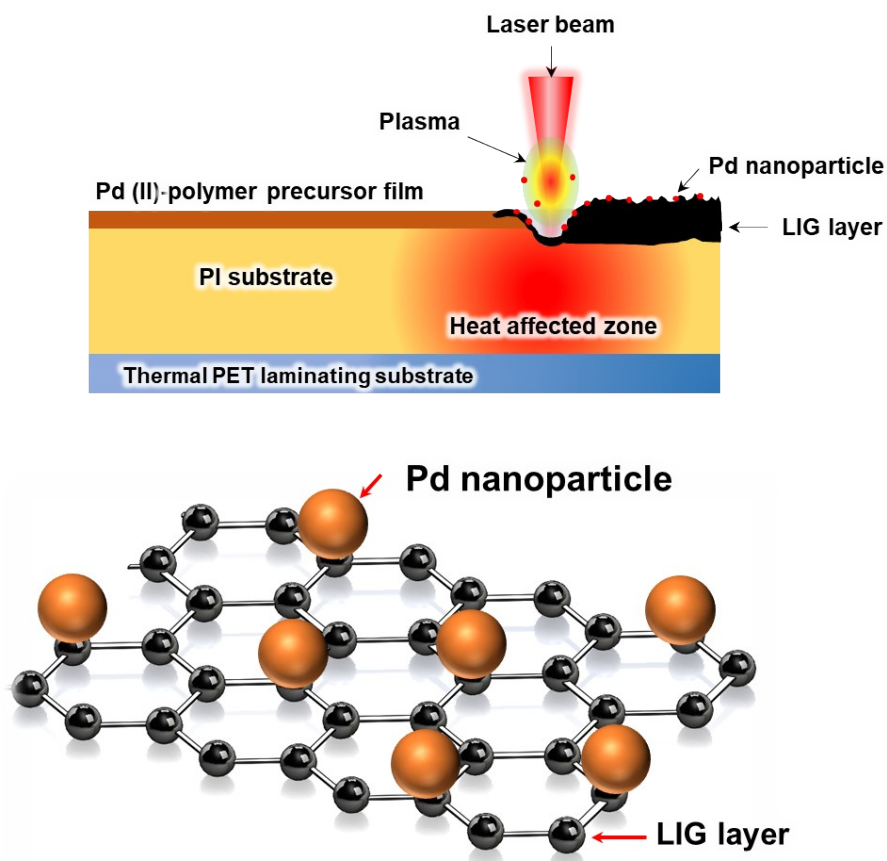

**Schematic S1.** Illustration of the laser induction process of Pd nanoparticles on the laser-induced graphene composite.

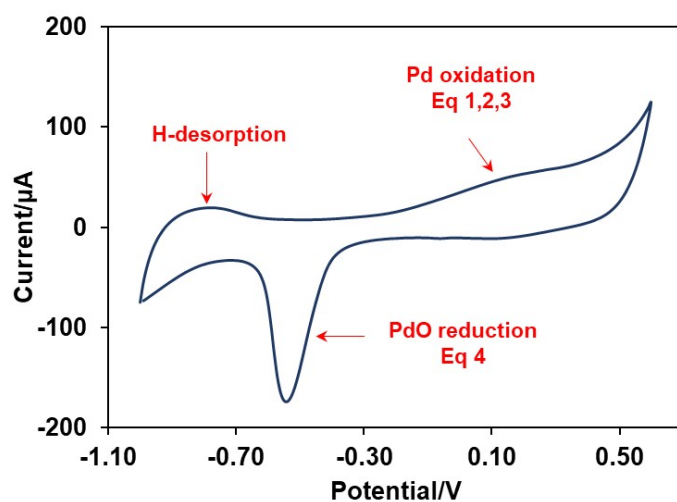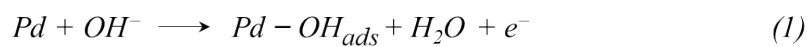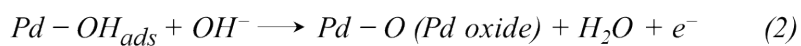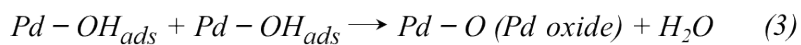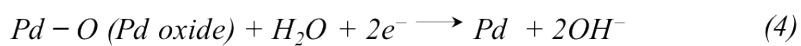

**Fig. S1.** CV response of nanoPd@LIG at scan rate of 0.05 V s<sup>-1</sup> in 0.1 mol L<sup>-1</sup> KOH; and the reaction mechanism of nanoPd@LIG.

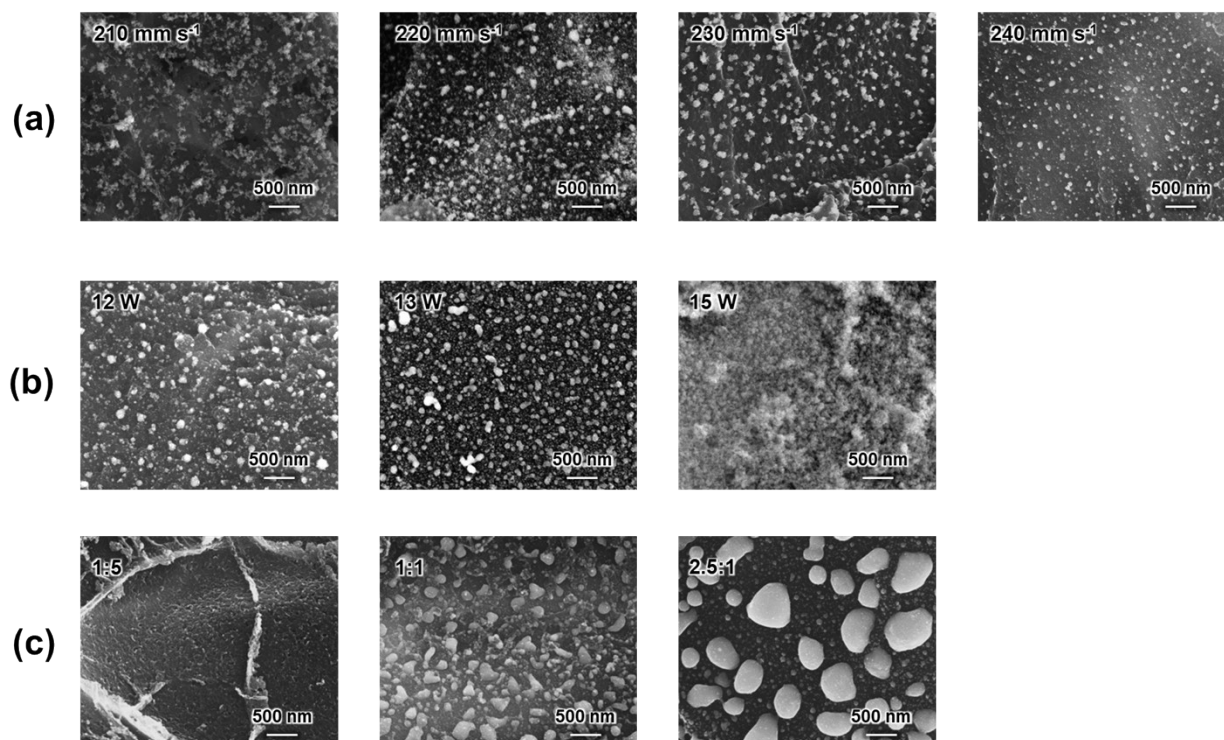

**Fig. S2.** SEM image in mixed mode between SE (Secondary Electrons) and BSE (Backscattered Electrons) mode of the PdNPs formed at (a) various laser scan speed (210, 220, 230, and 240 mm s<sup>-1</sup>) while keeping the laser power fixed at 14 W and precursor ratio at 1:2.5. (b) at laser powers (12, 13, and 15 W) while keeping the scan speed fixed at 220 mm s<sup>-1</sup> and precursor ratio at 1:2.5. (c) at the precursor ratio (1:5, 1:1, and 2.5:1 v/v) while keeping the scan speed and laser power fixed at 220 mm s<sup>-1</sup> and 14 W, respectively.

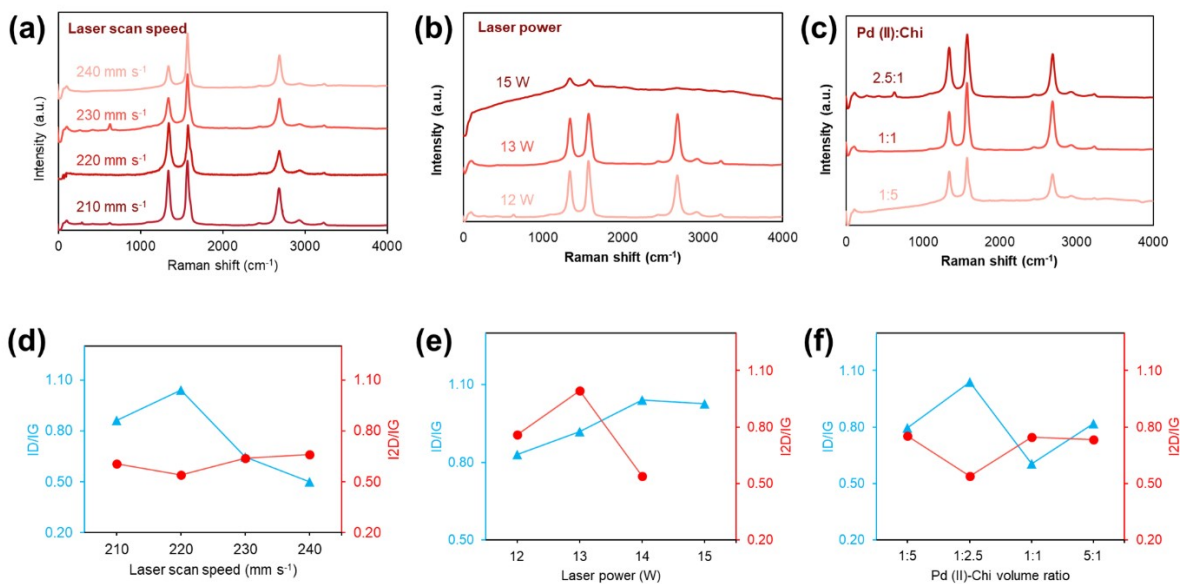

**Fig. S3.** Raman spectra and the intensity ratio ( $I_D/I_G$  and  $I_{2D}/I_G$ ) of nanoPd@LIG with different (a and d) laser scan speed 210–240  $\text{mm s}^{-1}$ , (b and e) laser power 12 – 15 W, and (c and f) Pd(II):Chi ratio of 1:5, 1:2.5, 1:1 and 2.5:1.

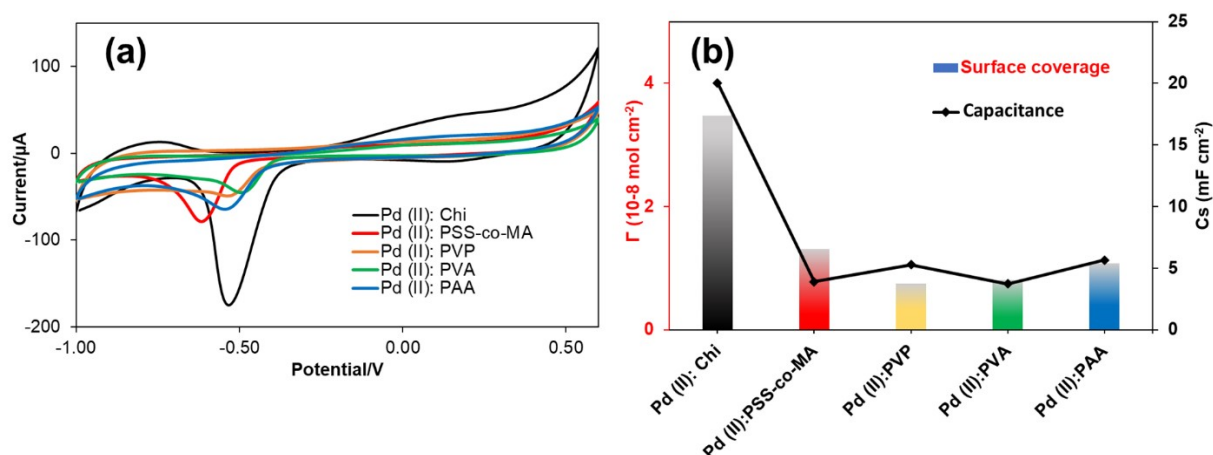

**Fig. S4.** (a) Cyclic voltammograms and (b) surface coverage of the catalytic activity and specific capacitance value of nanoPd@LIG nanocomposites fabricated using different polymers in the polymer–Pd(II)- precursor.

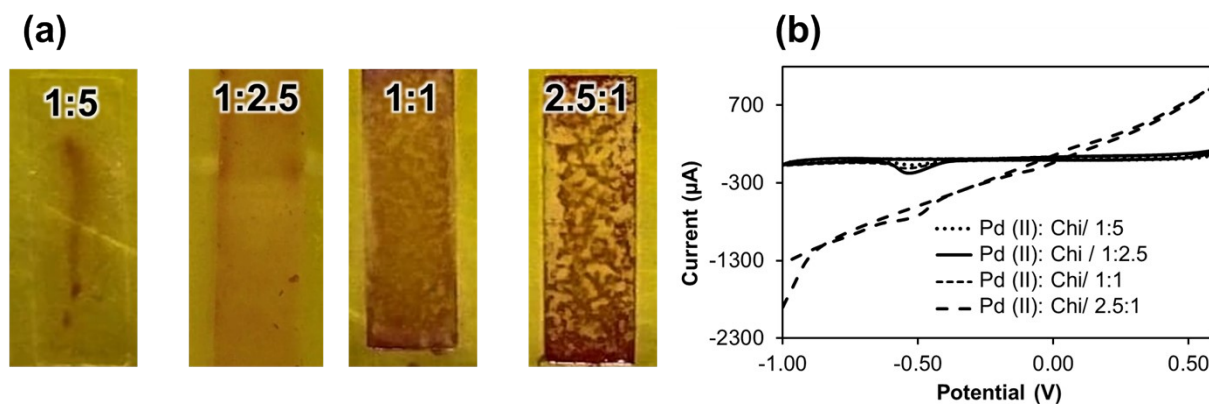

**Fig. S5.** (a) Photograph of top view laser irradiated Chi–Pd (II) precursors at different ratios. (b) Cyclic voltammograms of nanoPd@LIG synthesized at different Chi–Pd (II) ratios.

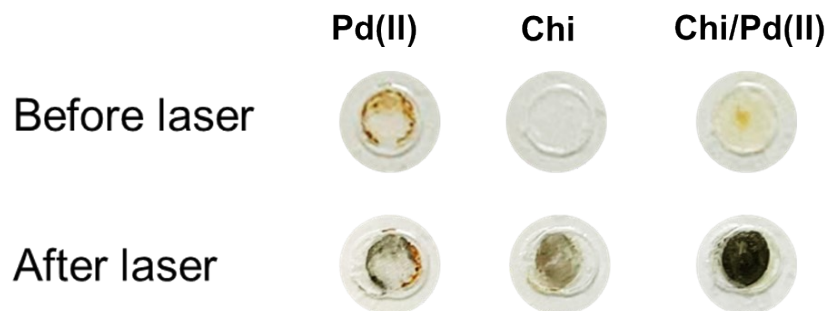

**Fig. S6.** Photographs of Pd (II), Chi, and Chi/Pd (II) film on glass slides before and after laser irradiation.

**Equation S1:**

$$\Psi = \frac{-0.6288 + 0.0021\Delta E_p}{1 - 0.017\Delta E_p} \quad (S1)$$

**Equation S2:**

$$\Psi = \frac{k_{\text{eff}}^0}{\left(\frac{n\pi F D \nu}{RT}\right)^{\frac{1}{2}}} \quad (S2)$$

$k_{\text{eff}}^0$  is heterogeneous electron transfer standard rate constant

$\Psi$  is kinetic parameter obtained from scan rate ( $\nu$ )-dependent cyclic voltammograms

$n$  is the number of electrons transferred

$F$  is the Faraday's constant

$\nu$  is the scan rate ( $\text{V s}^{-1}$ )

$R$  is the universal gas constant

$T$  is temperature (K)

$D$  is the diffusion coefficient of the redox probe

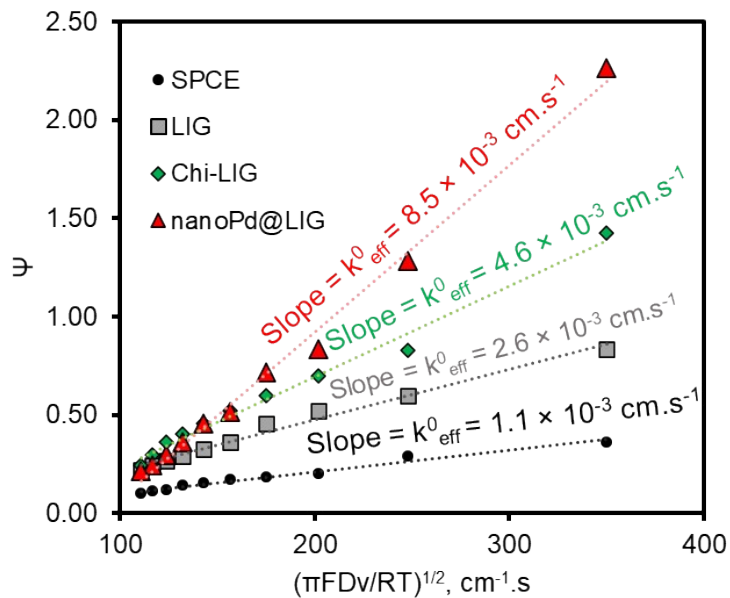

**Fig. S7.** HET kinetic analysis within the scan rate range of 10–100  $\text{mV s}^{-1}$ , showing the kinetic parameter  $\Psi$  obtained via Eq. (S1), along with the linear regression for the estimation of the effective HET standard rate constant,  $k_{\text{eff}}^0$ , via Eq. (S2).



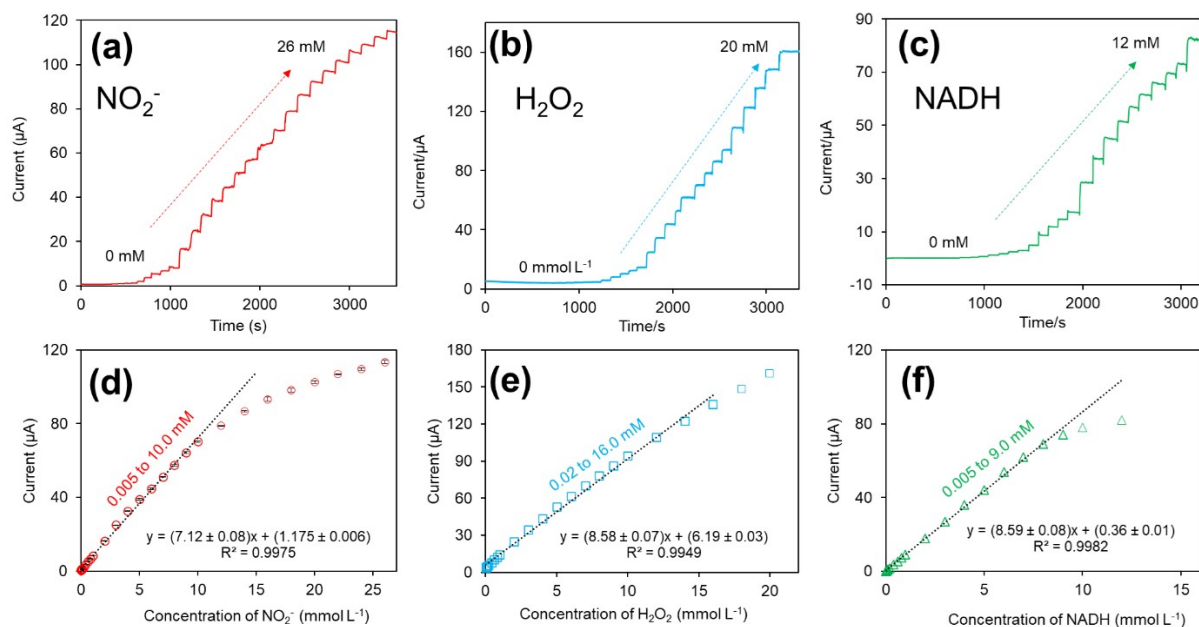

**Fig. S8.** The i-t curves and the corresponding calibration plots of nanoPd@LIG in a 0.10 mol L<sup>-1</sup> PB (pH 7.4) after successive additions of different concentrations of (a and d) NO<sub>2</sub><sup>-</sup> from 0 to 26 mmol L<sup>-1</sup> at 0.68 V (vs. pseudo-Ag/AgCl); (b and e) H<sub>2</sub>O<sub>2</sub> from 0 to 20 mmol L<sup>-1</sup> at 0.58 V (vs. pseudo-Ag/AgCl); and (c and f) NADH from 0 to 12 mmol L<sup>-1</sup> at 0.28 V (vs. pseudo-Ag/AgCl).

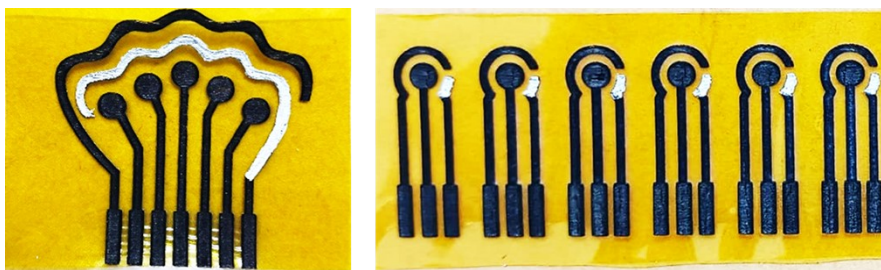

**Fig. S9.** Digital images of nanoPd@LIG in multi-working electrode and three-electrode systems.

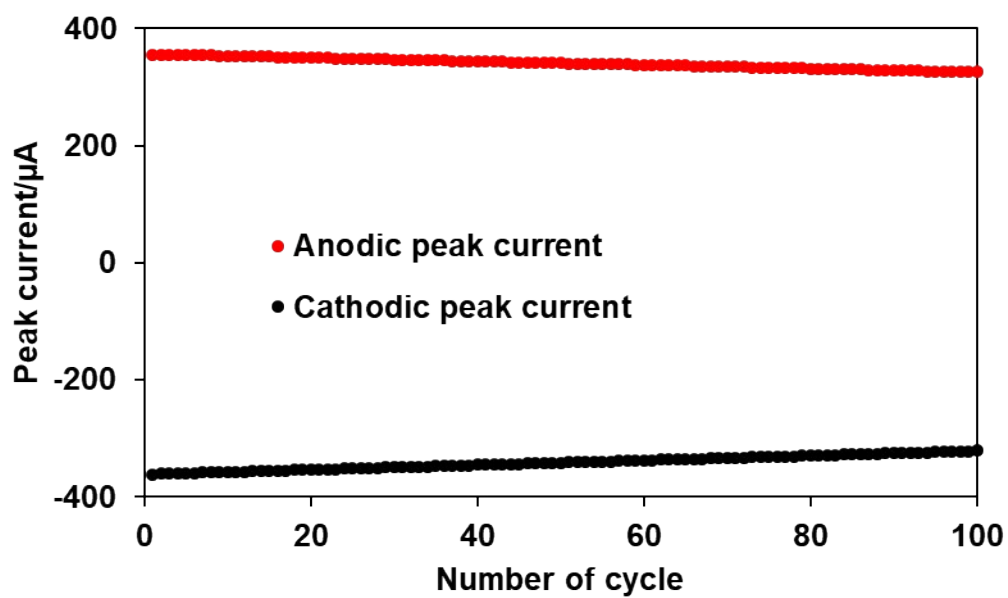

**Fig. S10.** Stability of nanoPd@LIG electrode in 5 mmol L<sup>-1</sup> [Fe(CN)<sub>6</sub>]<sup>3-/4-</sup> containing 1.0 mol L<sup>-1</sup> KCl via CV tests with consecutive 100 cycles.

**Table S1.** Summary of laser parameter optimization.

| Laser scan speed<br>(mm s <sup>-1</sup> ) | $\Gamma$<br>(10 <sup>-8</sup> mol cm <sup>-2</sup> ) | PdNPs size<br>(nm) | Cs<br>(mF cm <sup>-2</sup> ) | Pore size<br>( $\mu$ m) | Percentage of the element (%) |      |       |
|-------------------------------------------|------------------------------------------------------|--------------------|------------------------------|-------------------------|-------------------------------|------|-------|
|                                           |                                                      |                    |                              |                         | C                             | Pd   | Pd/C  |
| 210                                       | 2.2 $\pm$ 0.1                                        | 102 $\pm$ 34       | 13.1                         | 5 $\pm$ 2               | 87.4                          | 8.3  | 0.095 |
| 220                                       | 3.4 $\pm$ 0.1                                        | 94 $\pm$ 30        | 20.0                         | 3.5 $\pm$ 0.9           | 84.3                          | 11.8 | 0.140 |
| 230                                       | 2.7 $\pm$ 0.1                                        | 92 $\pm$ 29        | 13.2                         | 3.4 $\pm$ 1             | 88.9                          | 8.5  | 0.096 |
| 240                                       | 1.8 $\pm$ 0.6                                        | 77 $\pm$ 24        | 9.6                          | 5 $\pm$ 2               | 93.3                          | 3.9  | 0.042 |
|                                           |                                                      |                    |                              |                         |                               |      |       |
| Laser power<br>(W)                        | $\Gamma$<br>(10 <sup>-8</sup> mol cm <sup>-2</sup> ) | PdNPs size<br>(nm) | Cs<br>(mF cm <sup>-2</sup> ) | Pore size<br>( $\mu$ m) | Percentage of the element (%) |      |       |
|                                           |                                                      |                    |                              |                         | C                             | Pd   | Pd/C  |
| 12                                        | 1.56 $\pm$ 0.08                                      | 98 $\pm$ 50        | 7.479                        | 3 $\pm$ 1               | 90.0                          | 4.2  | 0.047 |
| 13                                        | 2.0 $\pm$ 0.1                                        | 105 $\pm$ 50       | 14.016                       | 3 $\pm$ 1               | 91.5                          | 5.5  | 0.060 |
| 14                                        | 3.3 $\pm$ 0.2                                        | 94 $\pm$ 30        | 20.027                       | 3.5 $\pm$ 0.9           | 84.3                          | 11.8 | 0.140 |
| 15                                        | 1.3 $\pm$ 0.4                                        | Cannot measure     | 17.587                       | 10 $\pm$ 6              | 72.4                          | 3.5  | 0.048 |
|                                           |                                                      |                    |                              |                         |                               |      |       |
| Ratio of Pd<br>(II): Chi (V/V)            | $\Gamma$<br>(10 <sup>-8</sup> mol cm <sup>-2</sup> ) | PdNPs size<br>(nm) | Cs<br>(mF cm <sup>-2</sup> ) |                         | Percentage of the element (%) |      |       |
|                                           |                                                      |                    |                              |                         | C                             | Pd   | Pd/C  |
| 1:5                                       | 1.00 $\pm$ 0.05                                      | Cannot measure     | 10.5                         |                         | 92.6                          | 2.9  | 0.031 |
| 1:2.5                                     | 3.3 $\pm$ 0.2                                        | 94 $\pm$ 30        | 20.0                         |                         | 84.3                          | 11.8 | 0.140 |
| 1:1                                       | 1.8 $\pm$ 0.3                                        | 159 $\pm$ 76       | 18.0                         |                         | 77.9                          | 15   | 0.193 |
| 2.5:1                                     | 1.1 $\pm$ 0.3                                        | 257 $\pm$ 253      | -                            |                         | 53.5                          | 45   | 0.841 |

**Table S2.** Summary of thickness of the LIG layers using thickness analyzer (Mitutoyo, model 543-790B, Japan) on laser parameter.

| Scan speed (mm s <sup>-1</sup> ) | Thickness (μm) |
|----------------------------------|----------------|
| 210                              | 14 ± 4         |
| 220                              | 17 ± 1         |
| 230                              | 20 ± 5         |
| 240                              | 24 ± 2         |
| Laser power (W)                  |                |
| 12                               | 21 ± 2         |
| 13                               | 17 ± 2         |
| 14                               | 16 ± 1         |
| 15                               | Crack          |

**Table S3.** Summary of characteristic bands present in Raman spectra.

| Electrode  |           | D      | G      | 2D     | D/G  | 2D/G |
|------------|-----------|--------|--------|--------|------|------|
| LIG        | Position  | 1346.5 | 1578.9 | 2695.2 | 0.80 | 0.61 |
|            | Intensity | 1701   | 2136.5 | 1293   |      |      |
|            | FWHM      | 40.4   | 21.0   | 58.3   |      |      |
| Chi@LIG    | Position  | 1346.4 | 1578.8 | 2693.1 | 0.40 | 0.46 |
|            | Intensity | 1762   | 4368   | 2026   |      |      |
|            | FWHM      | 48.0   | 32.39  | 50.1   |      |      |
| nanoPd@LIG | Position  | 1344.1 | 1578.9 | 2690.3 | 1.04 | 0.54 |
|            | Intensity | 2683.3 | 2580.3 | 1391.6 |      |      |
|            | FWHM      | 49.1   | 65.0   | 65.9   |      |      |

**Table S4.** Analytical performance of the nanoPd@LIG electrode for  $\text{NO}_2^-$ ,  $\text{H}_2\text{O}_2$ , and NADH detection.

| Analyte                | Linear range<br>( $\text{mmol L}^{-1}$ ) | Sensitivity<br>( $\mu\text{A L mmol}^{-1} \text{cm}^{-2}$ ) | LOD<br>( $\mu\text{mol L}^{-1}$ ) |
|------------------------|------------------------------------------|-------------------------------------------------------------|-----------------------------------|
| $\text{NO}_2^-$        | 0.005 – 10.0                             | 101                                                         | 2.5                               |
| $\text{H}_2\text{O}_2$ | 0.02 – 16.0                              | 122                                                         | 17.2                              |
| NADH                   | 0.005 – 9.0                              | 64                                                          | 3.4                               |
